# Supplementary material
Source: Royal Society of Chemistry journal article supplement (doi:10.1039/d6tb00339g)
Supplement: d6tb00339g1.pdf [file d6tb00339g1.pdf]

**Substrate-directed zinc phosphate nanodeposition for durable dentin bonding:  
One-step interfacial dehydration and proteolysis resistance**

Yifan Chen<sup>a,‡</sup>, Yajie Cheng<sup>b, c,‡</sup>, Yadong Chen<sup>b</sup>, Mengqi Pan<sup>b</sup>, Yanji Lu<sup>b</sup>, Xue Yang<sup>a</sup>, Qi Zhong<sup>b</sup>, Honghai Yan<sup>a\*</sup>, Qiaojie Luo<sup>b</sup>, Chang Shu<sup>b\*</sup>, Wei Yao<sup>a\*</sup>, Xiaodong Li<sup>b</sup>

<sup>a</sup> The Second Affiliated Hospital of Zhejiang Chinese Medical University, Hangzhou 310000, China

<sup>b</sup> Stomatology Hospital, School of Stomatology, Zhejiang University School of Medicine, Zhejiang Provincial Clinical Research Center for Oral Diseases, Zhejiang Key Laboratory of Oral Biomedical, Engineering Research Center of Oral Biomaterials and Devices of Zhejiang Province, Hangzhou 310000, China

<sup>c</sup> Department of Stomatology, Xiangyang No. 1 People's Hospital, Hubei University of Medicine, Xiangyang, 441000, China.

<sup>‡</sup> The authors contribute equally to this article and should be regarded as co-first authors.

\* Corresponding authors. Email: 20164625@zcmu.edu.cn; shuchang214@zju.edu.cn; yhhai01@163.com

## **Supplementary Information**

### **Supplementary Materials and Methods**

#### **Effect of buffer pH on the morphology of demineralized dentin matrix**

Prepare 30 mL of 50 mM HEPES buffer, divide it into three 10 mL aliquots, and adjust the pH of two aliquots to 5.0 and 4.5, respectively. Dentin slices were subjected to conventional acid etching, treated with the respective solutions for 30 s, rinsed for 20 s, and followed by graded ethanol dehydration and scanning electron microscopy (SEM) examination (Nova Nano 450, Thermo FEI, Waltham, CZ).

#### **In vitro evaluation of protein hydrolysis activity**

To evaluate the inhibitory effect of nano-ZnPs, a type I collagenase degradation assay was performed. The experiment was divided into four groups:

1. control group: 5 mL of 66  $\mu\text{g/mL}$  enzyme solution (from *Clostridium histolyticum*,  $\geq 125$  CDU/mg solid, Beyotime, Shanghai, CHN).
2.  $\text{Zn}^{2+}$  group: 5 mL of 30 mM  $\text{ZnSO}_4$  mixed with 5 mL of 132  $\mu\text{g/mL}$  enzyme solution.
3. ZnP group: 5 mL of 30 mM  $\text{ZnSO}_4$  was mixed with 5 mL of 20 mM  $\text{K}_2\text{HPO}_4$  for 30 s, centrifuged, and the precipitate was resuspended in 10 mL of 66  $\mu\text{g/mL}$  enzyme solution.
4.  $\text{Zn}^{2+} + \text{ZnP}$  group: 2.5 mL of 60 mM  $\text{ZnSO}_4$  was mixed with 2.5 mL of 40 mM  $\text{K}_2\text{HPO}_4$  for 30 s, followed by the addition of 5 mL of 132  $\mu\text{g/mL}$  enzyme solution.

Dentin slices were conventionally acid-etched and then incubated in the respective solutions at 37 °C for 2, 4, or 6 hours. After incubation, samples were thoroughly rinsed and followed by graded ethanol dehydration and SEM examination (Nova Nano 450, Thermo FEI, Waltham, CZ).

## Supplementary Figures

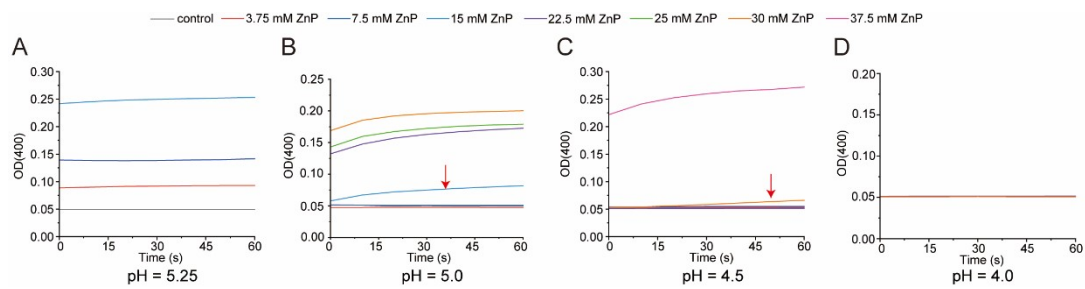

**Supplementary Fig. 1 Screening of kinetically suitable  $Zn^{2+}$ /phosphate precursor conditions by monitoring OD changes.** Optical density (OD) traces were recorded to evaluate turbidity onset in kinetically unstable mixtures of  $ZnSO_4$  and  $K_2HPO_4$  across a range of concentrations and pH values. (A) At pH 5.25, all concentration groups exhibited instantaneous turbidity, indicating rapid precipitation. (B) At pH 5.0, no turbidity developed in the 3.75 and 7.5 mM groups; the 15 mM group showed a gradual OD increase within 30 s, whereas the 22.5–30 mM groups precipitated immediately. (C) At pH 4.5, the 3.75–22.5 mM groups remained optically clear; the 30 mM group exhibited a delayed OD rise within 30 s, while the 37.5 and 45 mM groups showed immediate turbidity. (D) At pH 4.0, no precipitation occurred at any tested concentration.

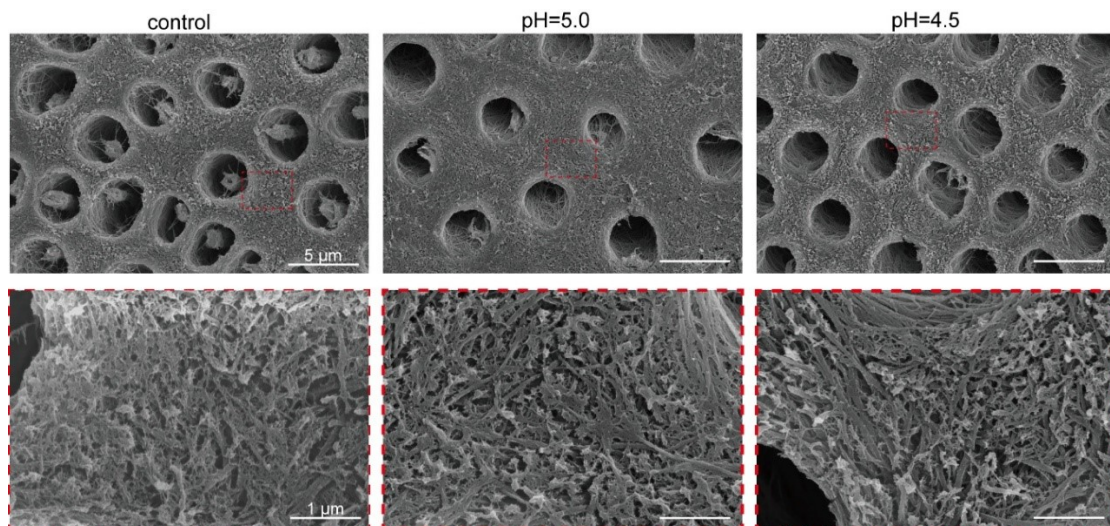

**Supplementary Fig. 2 The effect of pH in HEPES solutions on demineralized dentin.** Representative SEM images of demineralized dentin after treatment with 50 mM HEPES solutions at different pH values, with a magnified view of the region

highlighted by the red rectangle. Scale bars: 5  $\mu\text{m}$  (low magnification) and 1  $\mu\text{m}$  (high magnification).

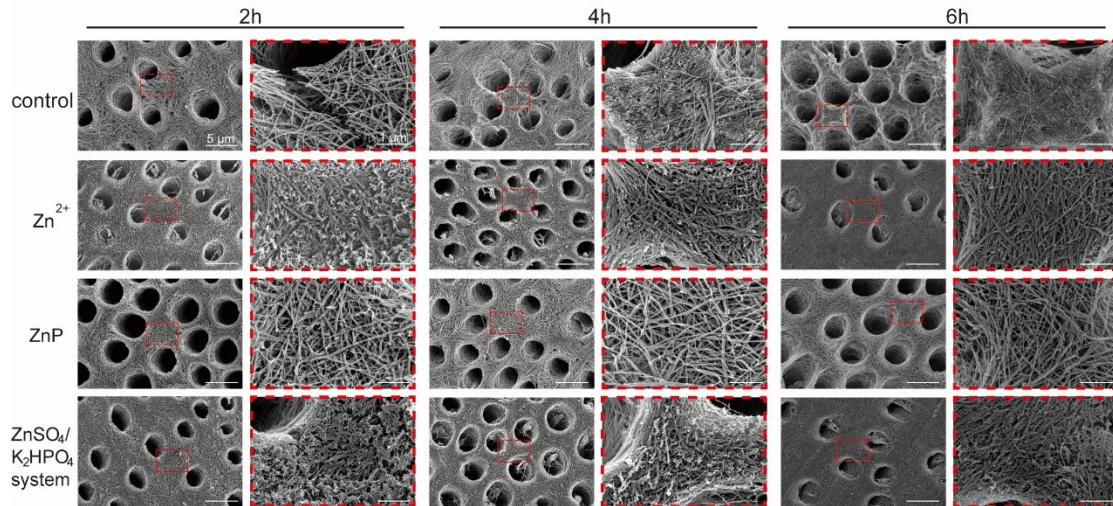

**Supplementary Fig. 3 Inhibitory effect of Zn<sup>2+</sup> and nano-ZnPs on exogenous collagenase.** SEM images showing the surface morphology of demineralized dentin matrix after treatment with different enzyme solutions for 2, 4, and 6 hours. Scale bars: 5  $\mu\text{m}$  (low magnification) and 1  $\mu\text{m}$  (high magnification).

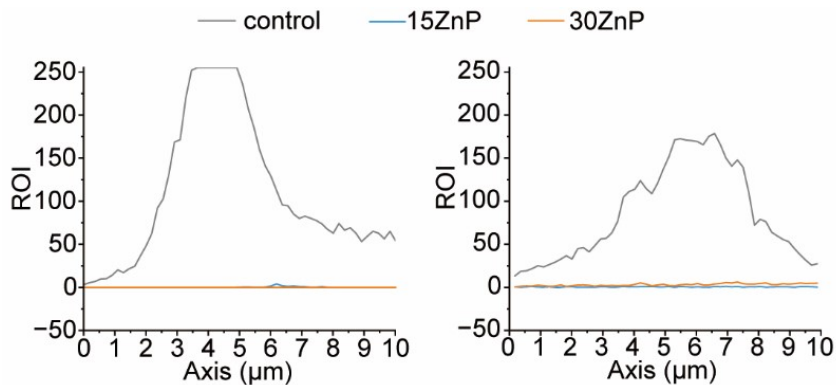

**Supplementary Fig. 4 Semi-quantitative analysis of *in situ* zymography fluorescence at the resin-dentin interfaces.** Fluorescence intensity profiles across the hybrid layer were quantified for each experimental group. The left panel presents longitudinal fluorescence distributions for the Single Bond 2 system, and the right panel shows the corresponding analysis for the Spectrum Bond system.
